# Supplementary material
Source: Research Square preprint supplement (doi:10.21203/rs.3.rs-9148958/v1)
Supplement: Supplementary file 2 [file 867f7c96dd4022ce78fd141f.docx]

# Table S1. Datasets used for benchmarking CASREL.

| **Cell type** | **Species** | **Sequencing technology** | **Cell number** | **RBP-AS**  **pairs** | **Reference** |
| --- | --- | --- | --- | --- | --- |
| Breast Cancer (TNBC-1) | Homo sapiens | Smart-seq2 | 443 | 7234 | Karaayvaz, et al., Nature commun., 2018 |
| Breast Cancer (TNBC-2) | Homo sapiens | Smart-seq2 | 422 | 10561 | Davis, et al., Nature cell biology, 2020 |
| T cell (HCC) | Homo sapiens | Smart-seq2 | 2349 | 13385 | Zheng, et al., Cell, 2017 |
| T cell (CRC) | Homo sapiens | Smart-seq2 | 11138 | 26590 | Zhang, et al., Nature, 2018 |
| T cell (NSCLC) | Homo sapiens | Smart-seq2 | 12021 | 10848 | Guo et al., Nature medicine, 2018 |
| NK (HCC) | Homo sapiens | Smart-seq2 | 1060 | 28641 | Zhang, et al., Cell, 2019 |
| DC (HCC) | Homo sapiens | Smart-seq2 | 406 | 13883 | Zhang, et al., Cell, 2019 |
| Macro. (HCC) | Homo sapiens | Smart-seq2 | 1158 | 26017 | Zhang, et al., Cell, 2019 |
| PDAC | Homo sapiens | 10X | 7504 | 18900 | Werba, et al., Nature commun., 2023 |
| NSCLC | Mus musculus | Smart-seq2 | 3584 | 15569 | Marjanovic et al., Cancer cell, 2020 |
| Brain cells | Mus musculus | Smart-seq2 | 1417 | 5533 | Tasic, et al., Nature neuroscience, 2016 |
| Gyrus cells | Mus musculus | 10X | 2442 | 711 | Hochgerner, et al., Nature neuroscience, 2018 |
